# Supplementary material
Source: HighWire-hosted journal article supplement (https://sti.bmj.com/content/sextrans-2021-055159)

## 95% family-wise confidence level

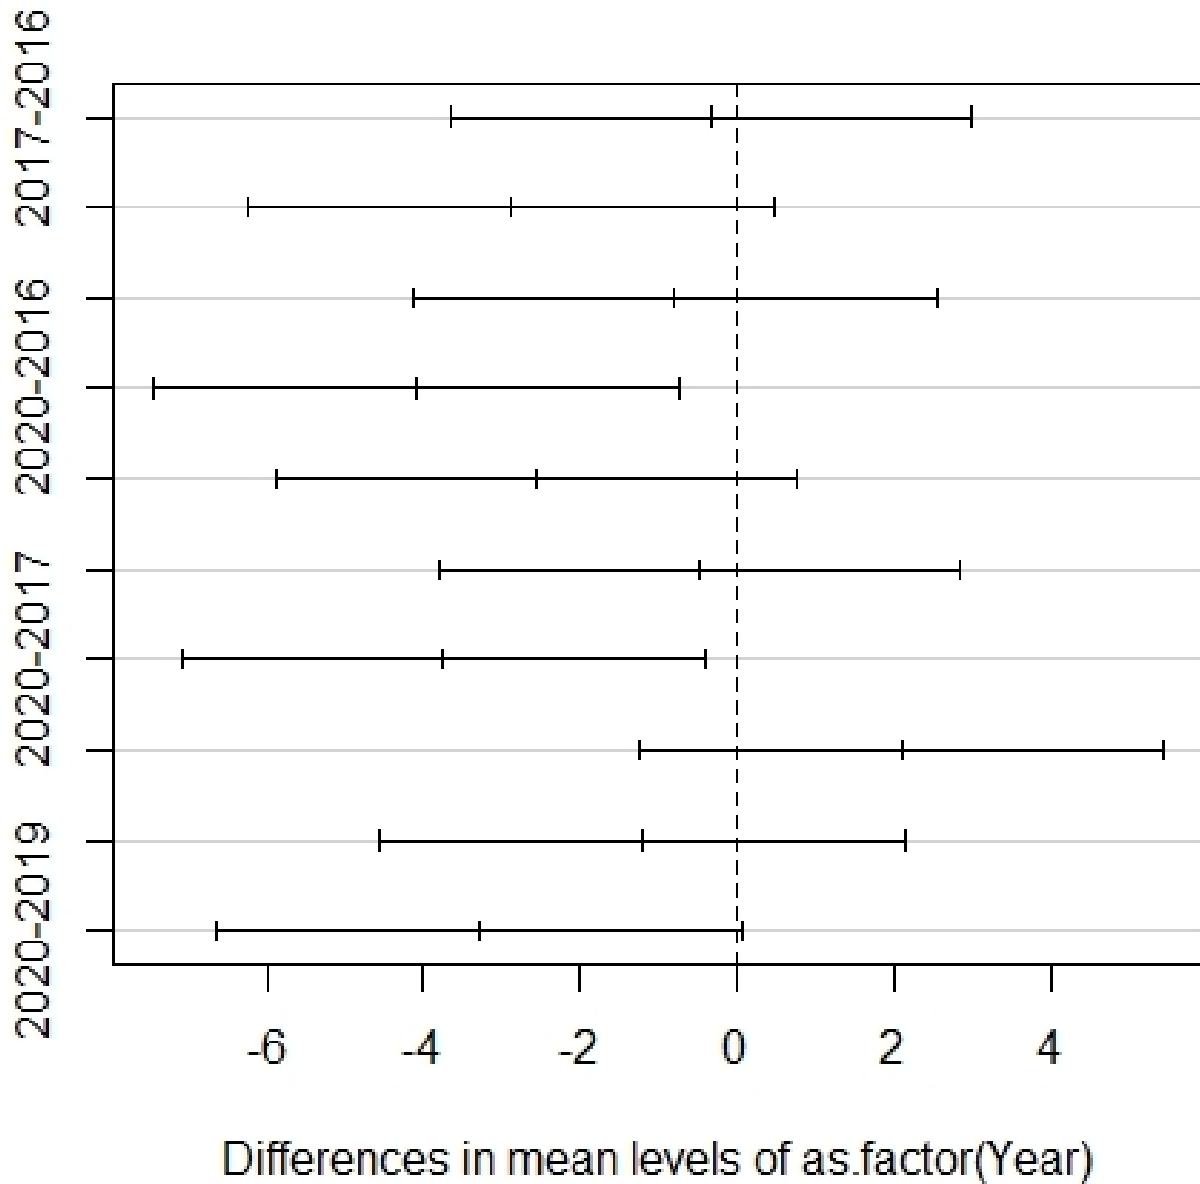

Supplement: inline-supplementary-material-3 [file inline-supplementary-material-3.pdf]
